# Supplementary material
Source: publisher figshare collection journal article supplement (https://rs.figshare.com/ndownloader/files/16851587)
Supplement: Supplementary file 1 [file 16851587]

species	appendage	mass	cor telson	spring telson	deformation telson	impulse telson	duration telson	cor abdomen	spring abdomen	deformation abdomen	impulse abdomen	duration abdomen
falcatus	smasher	0.24	0.51	22672	0.2203	2.59E-03	6.67E-04	0.9296	13946.7283	0.3354	2.56E-03	8.50E-04
falcatus	smasher	0.93	0.6	46270	0.0844	2.71E-03	4.67E-04	0.3561	13415.4735	0.2578	2.58E-03	8.67E-04
falcatus	smasher	0.3	0.67	90689	0.2153	2.18E-03	3.33E-04	0.5556	62978.195	0.3262	1.83E-03	4.00E-04
falcatus	smasher	1.12	0.63	43735	0.1393	3.10E-03	4.80E-04	0.5953	17143.4028	0.2985	2.02E-03	7.67E-04
falcatus	smasher	1.2	0.71	84745	0.1077	2.66E-03	3.45E-04	0.598	22672.1502	0.1292	2.31E-03	6.67E-04
espinosus	smasher	0.33	0.62	15166	0.0485	2.64E-03	8.24E-04	0.7121	9587.2723	0.2794	2.79E-03	1.05E-03
espinosus	smasher	0.41	0.59	41434	0.0355	2.62E-03	5.00E-04	0.6273	26217.5893	0.4498	2.62E-03	6.22E-04
espinosus	smasher	0.3	0.58	43297	0.0248	2.55E-03	4.94E-04	0.5381	9254.4442	0.434	2.50E-03	1.05E-03
espinosus	smasher	0.24	0.69	74062	0.0413	2.83E-03	3.73E-04	0.6393	17559.9265	0.2748	2.68E-03	8.00E-04
espinosus	smasher	0.32	0.64	59066	4.58E-03	2.71E-03	4.20E-04	0.7109	32260.4019	0.2538	2.82E-03	5.67E-04
chiragra	smasher	3.02	0.29	31980	0.1306	2.05E-03	6.42E-04	0.3468	10753.8712	0.2976	2.13E-03	1.01E-03
chiragra	smasher	4.1	0.32	61286	0.1272	2.11E-03	4.47E-04	0.4174	22117.7223	0.1802	2.24E-03	6.80E-04
chiragra	smasher	2.98	0.55	44776	0.036	2.42E-03	4.87E-04	0.5623	32451.2644	0.0306	2.53E-03	5.60E-04
chiragra	smasher	3.47	0.46	174764	0.1018	2.76E-03	2.47E-04	0.6167	28945.4782	0.255	2.60E-03	5.93E-04
chiragra	smasher	3.93	0.55	51869	0.119	2.48E-03	4.47E-04	0.2916	21421.4634	0.1996	2.08E-03	7.47E-04
chiragra	smasher	4.71	0.55	120822	0.0733	2.49E-03	3.20E-04	0.7286	41340.3945	0.1006	2.75E-03	4.97E-04
chiragra	smasher	5.93	0.5	22112	0.2174	2.39E-03	6.89E-04	0.4176	14175.7815	0.3256	2.25E-03	8.53E-04
smithii	smasher	5.36	0.52	61509	0.1666	2.40E-03	6.18E-04	0.449	30262.4151	0.2236	2.29E-03	5.93E-04
smithii	smasher	5.42	0.51	63510	0.1562	2.36E-03	4.40E-04	0.4827	52953.0946	0.1562	2.37E-03	4.40E-04
smithii	smasher	6.15	0.47	66507	0.1222	2.35E-03	4.04E-04	0.5141	37387.8488	0.1742	2.38E-03	5.26E-04
smithii	smasher	4.78	0.54	113802	0.0854	2.38E-03	3.20E-04	0.5298	33535.7103	0.1882	2.39E-03	5.53E-04
smithii	smasher	3.89	0.65	82375	0.1004	2.64E-03	3.53E-04	0.6521	44687.2065	0.2066	2.58E-03	4.80E-04
bredeni	smasher	1.29	0.63	90780	0.0986	2.65E-03	2.61E-04	0.671268379	18431.404	0.3206	2.64E-03	7.39E-04
bredeni	smasher	0.52	0.45	40306	0.2552	2.33E-03	5.00E-04	0.498572506	8548.2869	0.4095	2.43E-03	8.00E-04
bredeni	smasher	0.54	0.54	22672	0.0999	1.96E-03	6.67E-04	0.65835508	14130.8415	0.1237	2.10E-03	8.44E-04
bredeni	smasher	1.09	0.45	22977	0	2.21E-03	6.62E-04	0.556242619	11753.2427	0.022	2.28E-03	9.26E-04
bredeni	smasher	0.59	0.62	46270	0.2212	2.25E-03	4.67E-04	0.413988095	1453.1101	0.8662	2.11E-03	2.63E-03
festae	smasher	0.99	0.56	26214	0.2532	2.51E-03	6.20E-04	0.6638	10636.2123	0.439	2.71E-03	9.73E-04
festae	smasher	0.5	0.57	44660	0.1944	2.17E-03	4.75E-04	0.6111	13012.0238	0.3833	2.33E-03	8.80E-04
festae	smasher	1.03	0.33	12440	0.0652	1.93E-03	9.00E-04	0.3459	5861.8027	0.0791	2.32E-03	1.31E-03
festae	smasher	0.62	0.45	21792	0.3262	2.01E-03	6.80E-04	0.3608	5962.4327	0.4423	1.99E-03	1.30E-03
festae	smasher	1.09	0.61	32648	0	1.99E-03	5.56E-04	0.4907	12054.4201	0.2802	2.01E-03	9.14E-04
festae	smasher	0.93	0.52	36066	0.0586	2.09E-03	5.29E-04	0.5957	9973.952	0.0471	2.20E-03	1.01E-03
festae	smasher	0.8	0.8	111961	0.0824	1.94E-03	3.00E-04	0.5083	7619.2901	0.1648	2.24E-03	1.15E-03
festae	smasher	0.74	0.46	40306	0.0666	1.90E-03	5.00E-04	0.4126	7619.2901	0.0666	1.99E-03	1.15E-03
festae	smasher	1.26	0.76	251913	0	1.61E-03	2.00E-04	0.4463	10677.9639	0.0659	2.02E-03	9.71E-04
oerstidii	smasher	1.41	0.77	90689	0.1301	2.63E-03	3.33E-04	0.3184	3570.1925	0.2394	2.61E-03	1.68E-03
oerstidii	smasher	1.81	0.52	21792	0.044	2.64E-03	6.80E-04	0.1493	822.5723	0.2665	1.84E-03	3.50E-03
oerstidii	smasher	2.32	0.36	4081	0.0313	2.63E-03	1.57E-03	0.6111	2695.8561	0.5991	1.62E-03	1.93E-03
oerstidii	smasher	4.68	0.37	19438	0.1618	2.63E-03	7.20E-04	0.1522	1186.4404	0.5553	2.37E-03	2.91E-03
oerstidii	smasher	1.84	0.65	84436	0.0104	2.64E-03	3.45E-04	0.6304	33128.006	0.4372	1.63E-03	5.52E-04
wennerae	smasher	2.64	0.56	26634	0.1936	2.56E-03	6.20E-04	0.6219	26633.5353	0.3039	2.63E-03	7.67E-04
wennerae	smasher	1.06	0.56	32389	0.1938	2.55E-03	5.64E-04	0.6739	32388.5114	0.262	2.72E-03	7.03E-04
wennerae	smasher	3.34	0.57	23366	0.1869	2.55E-03	6.60E-04	0.6706	23365.9834	0.2982	2.68E-03	6.93E-04
wennerae	smasher	1.15	0.58	42903	0.1937	2.58E-03	4.93E-04	0.6621	42902.7567	0.3075	2.72E-03	6.51E-04
wennerae	smasher	2.08	0.52	16008	0.2302	2.45E-03	8.00E-04	0.66	16007.985	0.3139	2.68E-03	8.00E-04
wennerae	smasher	2.82	0.47	29696	0.1619	2.37E-03	5.93E-04	0.6159	29695.7429	0.2233	2.64E-03	5.26E-04
wennerae	smasher	2.45	0.51	26017	0.1563	2.42E-03	6.80E-04	0.7132	26016.7756	0.1948	2.79E-03	5.47E-04
wennerae	smasher	2.25	0.59	21907	0.2002	2.52E-03	6.80E-04	0.6713	21907.3896	0.2971	2.68E-03	7.13E-04
wennerae	smasher	4.6	0.4	18457	0.166	2.25E-03	7.40E-04	0.6357	18456.7465	0.296	2.64E-03	7.07E-04
wennerae	smasher	0.47	0.59	97337	0.1492	2.53E-03	3.52E-04	0.6667	97336.9995	0.2573	2.76E-03	2.51E-04
wennerae	smasher	0.85	0.76	163909	0.1145	2.88E-03	2.53E-04	0.7078	163909.4551	0.2307	2.82E-03	5.87E-04
wennerae	smasher	0.6	0.63	108535	0.1204	2.63E-03	3.19E-04	0.6999	108535.3346	0.3105	2.76E-03	7.21E-04
wennerae	smasher	1.71	0.51	36721	0.1387	2.45E-03	5.39E-04	0.6652	36721.2099	0.1978	2.71E-03	4.67E-04
wennerae	smasher	1.44	0.61	34867	0.1711	2.57E-03	5.47E-04	0.5442	34867.1764	0.2224	2.50E-03	6.00E-04
wennerae	smasher	1.07	0.67	118941	0.1512	2.68E-03	3.60E-04	0.703	118941.1763	0.2913	2.75E-03	7.00E-04
wennerae	smasher	3.35	0.49	42903	0.1369	2.43E-03	4.93E-04	0.7357	42902.7567	0.1597	2.85E-03	4.20E-04
latirostris	smasher	1.73	0.65	19438	0.2859	2.67E-03	7.20E-04	0.5095	4967.5512	0.5847	2.42E-03	1.42E-03
latirostris	smasher	1.04	0.58	5902	0.5972	2.57E-03	1.31E-03	0.5966	763.3078	1.4434	2.60E-03	3.63E-03
latirostris	smasher	1.52	0.54	23961	0.2036	2.49E-03	6.48E-04	0.7113	6024.0595	0.5551	2.78E-03	1.29E-03
latirostris	smasher	1.28	0.36	5962	0.3284	2.23E-03	1.30E-03	0.5366	1915.9132	1.0116	2.47E-03	2.29E-03
glyptocercus	smasher	0.62	0.53	25121	0.2424	2.50E-03	6.33E-04	0.6246	3406.0679	0.7675	2.70E-03	1.72E-03
glyptocercus	smasher	0.55	0.6	41813	0.206	2.56E-03	4.91E-04	0.6344	2976.2852	0.8483	2.69E-03	1.84E-03
glyptocercus	smasher	0.56	0.55	53662	0.1631	2.53E-03	4.33E-04	0.6034	1790.6036	1.055	2.59E-03	2.37E-03
glyptocercus	smasher	0.44	0.57	27990	0.2327	2.54E-03	6.00E-04	0.6381	3903.5399	0.6817	2.66E-03	1.61E-03
glyptocercus	smasher	0.72	0.58	33994	0.1965	2.55E-03	5.44E-04	0.5765	1882.9282	1.0277	2.56E-03	2.31E-03
trisponosa	smasher	0.24	0.65	16283	0.3397	2.68E-03	7.87E-04	0.4902	1701.794	1.065	2.43E-03	2.43E-03
trisponosa	smasher	0.7	0.59	17143	0.309	2.54E-03	7.67E-04	0.5571	3156.6259	0.8038	2.52E-03	1.79E-03
trisponosa	smasher	0.42	0.64	7520	0.52	2.68E-03	1.16E-03	0.4225	644.0139	1.6258	2.29E-03	3.96E-03
trisponosa	smasher	0.52	0.51	9198	0.4048	2.41E-03	1.05E-03	0.5945	2120.2995	0.9093	2.59E-03	2.18E-03
trisponosa	smasher	0.81	0.65	36828	0.2202	2.66E-03	5.23E-04	0.6232	4254.9618	0.723	2.61E-03	1.54E-03
californiensis	intermediate	102.16	0.16	73274	0.0715	1.74E-03	3.71E-04	0.5491	24946.1284	0.2804	2.43E-03	6.36E-04
californiensis	intermediate	73.46	0.21	45230	0.1031	1.91E-03	4.72E-04	0.2782	59943.5526	0.1758	1.94E-03	4.10E-04
californiensis	intermediate	24.33	0.19	14986	0.1496	1.90E-03	8.20E-04	0.2004	12440.1373	0.2484	1.93E-03	9.00E-04
californiensis	intermediate	29.15	0.12	17029	0.2413	1.80E-03	7.69E-04	0.35	19082.6952	1.5257	2.11E-03	7.27E-04
californiensis	intermediate	105.89	0.09	72296	0.0678	1.65E-03	3.73E-04	0.6226	23132.4867	0.2802	2.46E-03	6.60E-04
maculata	spearer	126.19	0.3	38879	0.1618	2.00E-03	5.09E-04	0.4797	627.8778	1.2317	2.23E-03	4.01E-03
maculata	spearer	192.32	0.37	32911	0.2145	2.29E-03	5.53E-04	0.4279	1382.2375	0.9171	2.38E-03	2.70E-03
maculata	spearer	36.52	0.55	29767	0.2524	2.44E-03	5.82E-04	0.4625	607.3098	1.4968	2.30E-03	4.07E-03
maculata	spearer	60.81	0.47	25121	0.2698	2.45E-03	6.33E-04	0.3431	959.8871	1.1287	2.22E-03	3.24E-03
ciliata	spearer	3.3	0.66	27990	0.2241	2.65E-03	6.00E-04	0.4941	18002.5896	0.3014	2.35E-03	7.48E-04
ciliata	spearer	3.82	0.57	21371	0.2786	2.50E-03	6.87E-04	0.707	23606.9869	0.2706	2.73E-03	6.53E-04
ciliata	spearer	3.75	0.67	34556	0.1672	2.58E-03	5.40E-04	0.2295	19802.734	0.2584	2.39E-03	7.13E-04
ciliata	spearer	3.78	0.58	31380	0.215	2.64E-03	5.67E-04	0.5023	13624.2715	0.3134	2.50E-03	8.60E-04
ciliata	spearer	4.64	0.63	83847	0.0989	2.70E-03	3.47E-04	0.567	9117.4144	0.3006	1.94E-03	1.05E-03
empusa	spearer	9.16	0.23	34832	0.1634	1.76E-03	5.47E-04	0.1277	1777.3562	0.2655	1.69E-03	2.73E-03
empusa	spearer	11.23	0.37	4928	0.2042	2.07E-03	1.70E-03	0.29	6056.764	0.332	1.93E-03	1.31E-03
empusa	spearer	7.61	0.36	41263	0.1385	2.14E-03	5.45E-04	0.51	15877.2868	0.2723	2.27E-03	8.00E-04
empusa	spearer	8.19	0.38	40130	0.2041	2.17E-03	6.06E-04	0.68	4965.3989	0.6025	2.57E-03	1.43E-03
empusa	spearer	9.54	0.32	13338	0.2289	1.97E-03	8.87E-04	0.58	26217.5893	0.2531	2.40E-03	6.22E-04
